# Supplementary material
Source: PubMed Central journal article supplement (PMC3372871)
Supplement: NIHMS369115-supplement-01.pdf [file NIHMS369115-supplement-01.pdf]

## Supplemental Information

### Rapid mitochondrial DNA segregation in primate preimplantation embryos precedes somatic and germline bottleneck

Hyo-Sang Lee,<sup>1</sup> Hong Ma,<sup>1</sup> Rita Cervera Juanes,<sup>1</sup> Masahito Tachibana,<sup>1</sup> Michelle Sparman,<sup>1</sup> Joy Woodward,<sup>1</sup> Cathy Ramsey,<sup>1</sup> Jing Xu,<sup>1</sup> Eun-Ju Kang,<sup>1</sup> Paula Amato,<sup>2</sup> Georg Mair<sup>3</sup>, Ralf Steinborn,<sup>3</sup> and Shoukhrat Mitalipov<sup>1,2,4,5,\*</sup>

<sup>1</sup>Division of Reproductive & Developmental Sciences, Oregon National Primate Research Center, <sup>2</sup>Departments of Obstetrics & Gynecology and <sup>4</sup>Molecular & Medical Genetics, and <sup>5</sup>Oregon Stem Cell Center, Oregon Health & Science University, Beaverton, Oregon, 97006, USA; <sup>3</sup>VetCore Facility for Research VetOmics, University of Veterinary Medicine, 1210 Vienna, Austria

\*Correspondence: [mitalipo@ohsu.edu](mailto:mitalipo@ohsu.edu)

## **Supplemental Inventory**

### **Supplemental Figures**

Figure S1. Restriction fragment length polymorphism (RFLP) analysis of mtDNA in organs and tissues of heteroplasmic fetuses and ESCs, related to Table 2.

Figure S2. Gender determination in ST blastocysts by TE biopsy and PCR.

### **Supplemental Tables**

Table S1. Heteroplasmy in blastomeres of 2-cell monkey embryos, related to Figure 2A.

Table S2. Heteroplasmy in blastomeres of 4-cell monkey embryos, related to Figure 2B.

Table S3. Heteroplasmy in ICM and TE of monkey blastocysts, related to Figure 2F.

Table S4. Heteroplasmy in individual cells of Hetero-1 ESC line.

Table S5. mtDNA carryover in organs and tissues of ST offspring.

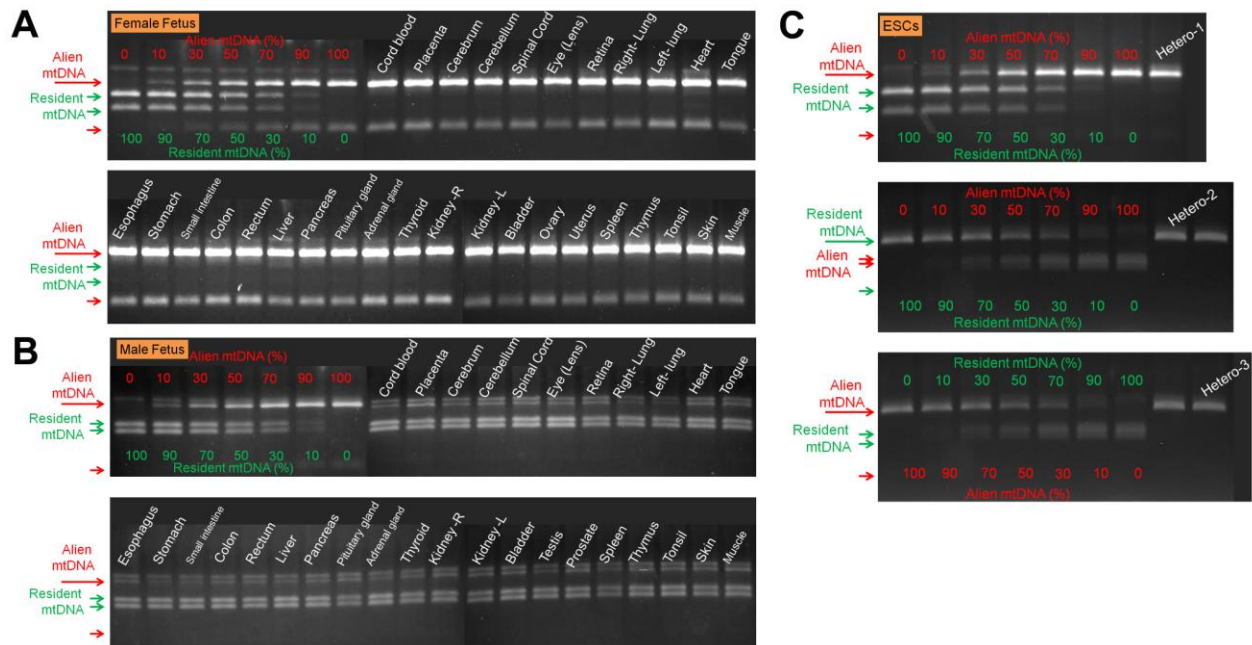

**Figure S1. Restriction fragment length polymorphism (RFLP) analysis of mtDNA in organs and tissues of heteroplasmic fetuses and ESCs.**

(A) MtDNA heteroplasmy detected by RFLP in tissues from the female fetus. Resident mtDNA digested with *KpnI* and alien mtDNA treated with *NheI* produced fragments of 319 bp + 224 bp and 417 bp + 126 bp length, respectively. RFLP analysis showed that the major mitochondrial haplotype in all tissues from this fetus was alien while the resident mtDNA was not detected except in liver and heart. (B) Heteroplasmy in tissues from the male fetus. RFLP assay with unique enzymes (*HindIII* for resident mtDNA and *EcoRV* for alien mtDNA) detected presence of both variants in this fetus. However, alien mtDNA bands were noticeably weaker. (C) Heteroplasmy in ESC lines produced from heteroplasmic embryos. Two cell lines (Hetero-1 and -3) carried alien mtDNA while Hetero-2 contained resident haplotype. For quantifications, both alien and resident mtDNA were mixed at various ratios (0, 10, 30, 50, 70, 90 and 100%), related to Table 2.

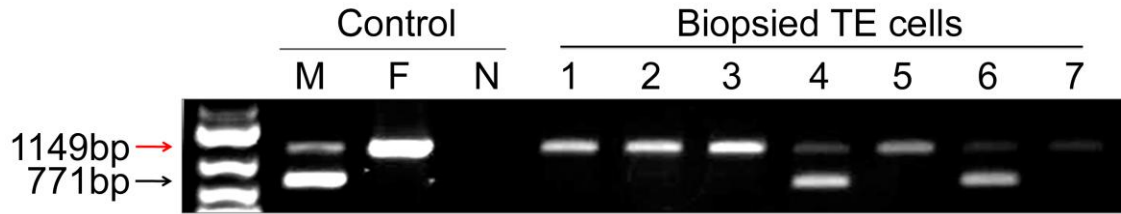

**Figure S2. Gender determination in ST blastocysts by TE biopsy and PCR.**

DNA was extracted from individually biopsied blastocysts and amplified by PCR. Male DNA samples produced two bands (1149 bp and 771 bp) and female DNA produced only one band (1149 bp). Blood DNA from rhesus monkey males (M) and females (F) was used as controls. For negative control (N) no DNA template was used. Samples in lanes 1, 2, 3, 5 and 7 were females and lanes 4 and 6 were indicated male blastocysts.

**Table S1. Heteroplasmy in blastomeres of monkey 2-cell embryos, related to Figure 2A**

| Embryo | Alien mtDNA (%) |              | Mean (%) | S.D. | CV (%) | Range |
|--------|-----------------|--------------|----------|------|--------|-------|
|        | Blastomere 1    | Blastomere 2 |          |      |        |       |
| 1      | 47              | 48           | 47.5     | 0.7  | 1.5    | 1     |
| 2      | 59              | 60           | 59.5     | 0.7  | 1.2    | 1     |
| 3      | 50              | 51           | 50.5     | 0.7  | 1.4    | 1     |
| 4      | 56              | 54           | 55       | 1.4  | 2.6    | 2     |
| 5      | 61              | 56           | 58.5     | 3.5  | 6.0    | 5     |
| 6      | 40              | 47           | 43.5     | 4.9  | 11.4   | 7     |
| 7      | 45              | 55           | 50       | 7.1  | 14.1   | 10    |
| 8      | 41              | 54           | 47.5     | 9.2  | 19.4   | 13    |
| 9      | 72              | 87           | 79.5     | 10.6 | 13.3   | 15    |
| 10     | 57              | 75           | 66       | 12.7 | 19.3   | 18    |
| 11     | 63              | 40           | 51.5     | 16.3 | 31.6   | 23    |
| 12     | 46              | 73           | 59.5     | 19.1 | 32.1   | 27    |
| 13     | 57              | 28           | 42.5     | 20.5 | 48.2   | 29    |
| 14     | 36              | 70           | 53       | 24.0 | 45.4   | 34    |
|        |                 | Mean         | 54.6     | 9.4  | 17.7   | 13.3  |
|        |                 | S.D.         | 9.7      |      |        | 11.4  |
|        |                 | CV (%)       | 17.9     |      |        |       |

S.D., standard deviation; CV, coefficient of variation; Range, differences between maximum and minimum values in daughter blastomeres.

**Table S2. Heteroplasmy in blastomeres of monkey 4-cell embryos, related to Figure 2B**

| Embryo | Alien mtDNA (%) in blastomere |    |    |    | Mean   | S.D. | CV (%) | Range |      |
|--------|-------------------------------|----|----|----|--------|------|--------|-------|------|
|        | 1                             | 2  | 3  | 4  |        |      |        |       |      |
| 1      | 52                            | 55 | 55 | 57 | 54.8   | 2.1  | 3.8    | 5     |      |
| 2      | 53                            | 54 | 55 | 59 | 55.3   | 2.6  | 4.8    | 6     |      |
| 3      | 46                            | 49 | 50 | 52 | 49.3   | 2.5  | 5.1    | 6     |      |
| 4      | 53                            | 58 | 59 | 64 | 58.5   | 4.5  | 7.7    | 11    |      |
| 5      | 31                            | 40 | 28 | 35 | 33.5   | 5.2  | 15.5   | 12    |      |
| 6      | 62                            | 69 | 73 | 75 | 69.8   | 5.7  | 8.2    | 13    |      |
| 7      | 67                            | 58 | 66 | 71 | 65.5   | 5.4  | 8.3    | 13    |      |
| 8      | 57                            | 59 | 65 | 72 | 63.3   | 6.8  | 10.7   | 15    |      |
| 9      | 48                            | 50 | 59 | 65 | 55.5   | 7.9  | 14.3   | 17    |      |
| 10     | 34                            | 46 | 49 | 53 | 45.5   | 8.2  | 18.0   | 19    |      |
| 11     | 44                            | 58 | 60 | 66 | 57.0   | 9.3  | 16.3   | 22    |      |
| 12     | 43                            | 43 | 64 | 66 | 54.0   | 12.7 | 23.6   | 23    |      |
| 13     | 41                            | 43 | 64 | 65 | 53.3   | 13.0 | 24.5   | 24    |      |
| 14     | 25                            | 42 | 50 | 50 | 41.8   | 11.8 | 28.2   | 25    |      |
| 15     | 27                            | 29 | 36 | 54 | 36.5   | 12.3 | 33.7   | 27    |      |
| 16     | 41                            | 44 | 48 | 70 | 50.8   | 13.1 | 25.9   | 29    |      |
| 17     | 55                            | 69 | 72 | 88 | 71.0   | 13.5 | 19.1   | 33    |      |
| 18     | 43                            | 54 | 55 | 78 | 57.5   | 14.7 | 25.6   | 35    |      |
| 19     | 40                            | 56 | 71 | 76 | 60.8   | 16.2 | 26.7   | 36    |      |
| 20     | 13                            | 24 | 28 | 49 | 28.5   | 15.1 | 52.9   | 36    |      |
| 21     | 45                            | 47 | 67 | 85 | 61.0   | 18.8 | 30.9   | 40    |      |
| 22     | 21                            | 32 | 33 | 67 | 38.3   | 19.9 | 52.1   | 46    |      |
| 23     | 3                             | 23 | 35 | 52 | 28.3   | 20.6 | 73.0   | 49    |      |
| 24     | 12                            | 31 | 34 | 77 | 38.5   | 27.5 | 71.3   | 65    |      |
|        |                               |    |    |    | Mean   | 51.2 | 11.2   | 25.0  | 25.3 |
|        |                               |    |    |    | S.D.   | 12.3 |        |       | 15.1 |
|        |                               |    |    |    | CV (%) | 24.1 |        |       |      |

S.D., standard deviation; CV, coefficient of variation; Range, differences between maximum and minimum values in daughter blastomeres.

**Table S3. Heteroplasmy in ICM and TE of monkey blastocysts, related to Figure 2F**

| Embryo | Alien mtDNA (%) |      | Mean | S.D. | CV (%) | Range |
|--------|-----------------|------|------|------|--------|-------|
|        | ICM             | TE   |      |      |        |       |
| 1      | 81              | 58   | 69.5 | 16.3 | 23.4   | 23    |
| 2      | 73              | 66   | 69.5 | 4.9  | 7.1    | 7     |
| 3      | 66              | 52   | 59   | 9.9  | 16.8   | 14    |
| 4      | 63              | 56   | 59.5 | 4.9  | 8.3    | 7     |
| 5      | 63              | 59   | 61   | 2.8  | 4.6    | 4     |
| 6      | 62              | 43   | 52.5 | 13.4 | 25.6   | 19    |
| 7      | 60              | 56   | 58   | 2.8  | 4.9    | 4     |
| 8      | 58              | 60   | 59   | 1.4  | 2.4    | 2     |
| 9      | 58              | 68   | 63   | 7.1  | 11.2   | 10    |
| 10     | 57              | 51   | 54   | 4.2  | 7.9    | 6     |
| 11     | 56              | 68   | 62   | 8.5  | 13.7   | 12    |
| 12     | 52              | 83   | 67.5 | 21.9 | 32.5   | 31    |
| 13     | 51              | 53   | 52   | 1.4  | 2.7    | 2     |
| 14     | 50              | 53   | 51.5 | 2.1  | 4.1    | 3     |
| 15     | 46              | 58   | 52   | 8.5  | 16.3   | 12    |
| 16     | 44              | 58   | 51   | 9.9  | 19.4   | 14    |
| 17     | 42              | 62   | 52   | 14.1 | 27.2   | 20    |
| 18     | 40              | 48   | 44   | 5.7  | 12.9   | 8     |
| Mean   | 56.8            | 58.4 | 57.6 | 7.8  | 13.4   | 11.0  |
| S.D.   | 10.7            | 9.0  | 7.1  |      |        | 8.0   |
| CV (%) | 18.8            | 15.4 | 7.1  |      |        |       |

S.D., standard deviation; CV, coefficient of variation; Range, differences between ICM and TE values.

**Table S4. Heteroplasmy in individual cells of Hetero-1 ESC line.**

|         | Alien mtDNA (%) |
|---------|-----------------|
| Clone-1 | 90.7            |
| Clone-2 | 92.9            |
| Clone-3 | 92.9            |
| Clone-4 | 100             |
| Clone-5 | 100             |
| Clone-6 | 100             |
| Clone-7 | 100             |
| Clone-8 | 100             |
| Clone-9 | 100             |
| Mean    | 97.4%           |



**Table S5. mtDNA carryover in organs and tissues of ST offspring**

| <b>Organ</b>    | <b>Fetus #1 (%)</b> | <b>Fetus #2 (%)</b> |
|-----------------|---------------------|---------------------|
| Cerebrum        | ND                  | 0.19                |
| Cerebellum      | ND                  | ND                  |
| Heart           | ND                  | 0.48                |
| Lung            | ND                  | ND                  |
| Blood           | ND                  | 0.13                |
| Stomach         | ND                  | ND                  |
| Small intestine | ND                  | ND                  |
| Colon           | ND                  | ND                  |
| Liver           | ND                  | ND                  |
| Pancreas        | ND                  | ND                  |
| Adrenal gland   | ND                  | 0.2                 |
| Thyroid         | ND                  | ND                  |
| Kidney-right    | ND                  | ND                  |
| Kidney-left     | ND                  | ND                  |
| Bladder         | ND                  | ND                  |
| Uterus          | ND                  | ND                  |
| Spleen          | ND                  | ND                  |
| Thymus          | ND                  | ND                  |
| Skin            | ND                  | ND                  |
| Skeletal Muscle | ND                  | ND                  |

ND, not detectable
